# Supplementary material for: UPO Biobank: The Challenge of Integrating Biobanking into the Academic Environment to Support Translational Research
Source: MDPI journal article supplement (doi:10.3390/jpm13060911), 2023-05-29
Supplement: s1 [file s1]

**Supplementary Table S1.** Biological material stored in UPO Biobank.

| PROJECT                                  | EDTA<br>plasma | Sodium-<br>citrate<br>plasma | Lithium-<br>heparin<br>plasma | Serum | PBMCs | DNA-RNA | Saliva | Urine | Stool |
|------------------------------------------|----------------|------------------------------|-------------------------------|-------|-------|---------|--------|-------|-------|
| UPO-COVID-19                             | X              | X                            | X                             | X     | X     | X       |        |       |       |
| The UnIRSA<br>Cohort Study               | X              | X                            |                               | X     |       | X       | X      |       |       |
| ddPCR<br>OnCOVID                         | X              | X                            |                               | X     |       | X       |        |       |       |
| AOU-ddPCR                                | X              | X                            |                               | X     | X     | X       |        |       |       |
| ema – NTA                                | X              | X                            |                               | X     |       | X       |        |       |       |
| BioMAge                                  | X              | X                            | X                             | X     |       | X       | X      | X     |       |
| DM-PREVENT                               | X              | X                            | X                             | X     |       | X       |        | X     | X     |
| TED                                      | X              | X                            | X                             | X     | X     | X       |        |       |       |
| NO-MORE-COVID-<br>19                     | X              | X                            | X                             | X     |       | X       | X      | X     |       |
| KETOMI                                   | X              | X                            | X                             | X     |       | X       |        | X     | X     |
| KT-UPO-B<br>(sampling begins in<br>2023) | X              |                              | X                             | X     | X     | X       | X      | X     |       |

|                                       |   |   |   |   |   |   |   |   |   |
|---------------------------------------|---|---|---|---|---|---|---|---|---|
| NO-MORE-COVID-19                      | X | X | X | X |   | X | X | X |   |
| SIDERALE<br>(sampling begins in 2023) | X | X | X | X |   | X |   | X | X |
| DELIVIDA<br>(sampling begins in 2023) | X | X | X | X | X | X | X | X |   |
| OPTION<br>(sampling begins in 2023)   | X | X | X | X |   | X | X | X | X |

**Supplementary Table S2.** Associated data stored in UPO Biobank.

| LABORATORY DATA                                                                                                                                                                                                                                                                                                                                 |                                                                                                                                                         |                                                                                                                                                                                                                                                                                                                                                                                                                                 |                                                                                                                                                                                                                                                                                                                                                  |                                                                                                                                                                                                   |
|-------------------------------------------------------------------------------------------------------------------------------------------------------------------------------------------------------------------------------------------------------------------------------------------------------------------------------------------------|---------------------------------------------------------------------------------------------------------------------------------------------------------|---------------------------------------------------------------------------------------------------------------------------------------------------------------------------------------------------------------------------------------------------------------------------------------------------------------------------------------------------------------------------------------------------------------------------------|--------------------------------------------------------------------------------------------------------------------------------------------------------------------------------------------------------------------------------------------------------------------------------------------------------------------------------------------------|---------------------------------------------------------------------------------------------------------------------------------------------------------------------------------------------------|
| HEMATOLOGY                                                                                                                                                                                                                                                                                                                                      | DIFFERENTIAL LEUKOCYTE COUNT                                                                                                                            | BIOCHEMISTRY                                                                                                                                                                                                                                                                                                                                                                                                                    | URINE BIOCHEMISTRY                                                                                                                                                                                                                                                                                                                               | MOLECULAR BIOLOGY                                                                                                                                                                                 |
| <ul style="list-style-type: none"> <li>Laboratory location</li> <li>Reference values</li> <li>Exam date</li> <li>White blood cells (<math>\times 10^3/\text{microL}</math>)</li> <li>Red blood cells (<math>\times 10^6/\text{microL}</math>)</li> <li>Hemoglobin (g/dL)</li> <li>Platelets (<math>\times 10^3/\text{microL}</math>)</li> </ul> | <ul style="list-style-type: none"> <li>Neutrophils %</li> <li>Lymphocytes %</li> <li>Monocytes %</li> <li>Eosinophils %</li> <li>Basophils %</li> </ul> | <ul style="list-style-type: none"> <li>Basal glucose (mg/dl)</li> <li>Creatinine (mg/dl)</li> <li>Estimated glomerular filtrate rate (eGFR)</li> <li>Total cholesterol (mg/dl)</li> <li>Cholesterol HDL (mg/dL)</li> <li>Cholesterol LDL (mg/dL)</li> <li>Triglycerides (mg/dl)</li> <li>GOT/AST (U/L)</li> <li>GPT/ALT (U/L)</li> <li>GGT (U/L)</li> <li>Glycated hemoglobin</li> <li>Na (mEq/L)</li> <li>K (mEq/L)</li> </ul> | <ul style="list-style-type: none"> <li>Morphologic description</li> <li>pH</li> <li>Glucose (mg/dL)</li> <li>Proteins (mg/dL)</li> <li>Hemoglobin (mg/dL)</li> <li>Ketone bodies (mg/dL)</li> <li>Bilirubin (mg/dL)</li> <li>Urobilinogen (mg/dL)</li> <li>Specific weight</li> <li>Nitrites</li> <li>Leukocyte esterase (Leu/microL)</li> </ul> | <ul style="list-style-type: none"> <li>Research of SARS-CoV2</li> <li>Date 1st + swab</li> <li>Date 1st – swab</li> <li>IgG SARS-CoV-2 antibodies (CLIA method)</li> <li>Serology date</li> </ul> |

| ANAMNESIS |                                                                                                                                                                                   |                                                                                                                                                                                                                                                               |                                                                                                                                                                                                                                                                                                 |                                                                                                                                                                                                                                                      |
|-----------|-----------------------------------------------------------------------------------------------------------------------------------------------------------------------------------|---------------------------------------------------------------------------------------------------------------------------------------------------------------------------------------------------------------------------------------------------------------|-------------------------------------------------------------------------------------------------------------------------------------------------------------------------------------------------------------------------------------------------------------------------------------------------|------------------------------------------------------------------------------------------------------------------------------------------------------------------------------------------------------------------------------------------------------|
| ANAMNESIS | GENERAL INFORMATION                                                                                                                                                               | PATHOLOGIES                                                                                                                                                                                                                                                   | ACTIVITIES - OCCUPATION                                                                                                                                                                                                                                                                         | WORK                                                                                                                                                                                                                                                 |
|           | <ul style="list-style-type: none"> <li>Screening programs (breast, colon, rectum, etc.)</li> <li>Surgical interventions (nervous, endocrine, respiratory system, etc.)</li> </ul> | <ul style="list-style-type: none"> <li>Type of pathology (Alzheimer, hepatic cirrhosis, depression, etc.)</li> <li>Date of diagnosis</li> <li>Details on the kind of disease</li> <li>Stage of the disease</li> <li>Medicines/homeopathic products</li> </ul> | <ul style="list-style-type: none"> <li>Employment definition (full-time, part-time, unemployed, retired, etc.)</li> <li>Work shifts</li> <li>Physical activity performed in the workplace (sedentary, standing, manual, etc.)</li> <li>Exposures (solvents, varnishes, paints, etc.)</li> </ul> | <ul style="list-style-type: none"> <li>Work category (agriculture, industry, mechanical engineering, transportation, etc.)</li> <li>Clarifications about the workplace</li> <li>Clarifications on the instrumentations and materials used</li> </ul> |

**Supplementary Table S3.** Age distribution of subjects.

| AGE -<br>MINIMUM | AGE -<br>MAXIMUM | AGE –<br>MEAN | STANDARD<br>DEVIATION | AGE - PERCENTILE |      |      |                  |      |      |      |
|------------------|------------------|---------------|-----------------------|------------------|------|------|------------------|------|------|------|
|                  |                  |               |                       | 0.05             | 0.10 | 0.25 | 0.50<br>(MEDIAN) | 0.75 | 0.90 | 0.95 |
| 21               | 92               | 57            | 16.01                 | 81               | 77   | 69   | 58               | 45   | 32   | 28   |
